# Supplementary material for: 2D coordination sheets based on tetranuclear cuprofullerene pentafluorobenzoate and their electronic properties
Source: Royal Society of Chemistry journal article supplement (doi:10.1039/d2qi02641d), 2023-01-01
Supplement: d2qi02641d1.pdf [file d2qi02641d1.pdf]

*Electronic Supplementary Information (ESI)*

**2D Coordination Sheets Based on Tetranuclear Cuprofullerene  
Pentafluorobenzoate and Their Electronic Properties**

Yu-Li Liu,<sup>a</sup> Shun-Ze Zhan,<sup>\*ab</sup> Guo-Hui Zhang,<sup>a</sup> Xian-Yun Tao,<sup>a</sup> Kun Hu,<sup>a</sup> Deng-Feng  
Luo,<sup>a</sup> Li Dang,<sup>a</sup> Seik Weng Ng<sup>c</sup> and Dan Li<sup>b</sup>

<sup>a</sup> *College of Chemistry and Chemical Engineering, and Key Laboratory for Preparation and Application of Ordered Structural Materials of Guangdong Province, Shantou University, Shantou 515063, P. R. China*

*\*Email: [szzhan@stu.edu.cn](mailto:szzhan@stu.edu.cn)*

<sup>b</sup> *College of Chemistry and Materials Science, and Guangdong Provincial Key Laboratory of Functional Supramolecular Coordination Materials and Applications, Jinan University, Guangzhou 510632, P. R. China*

<sup>c</sup> *UCSI University, Cheras, Kuala Lumpur, Malaysia*

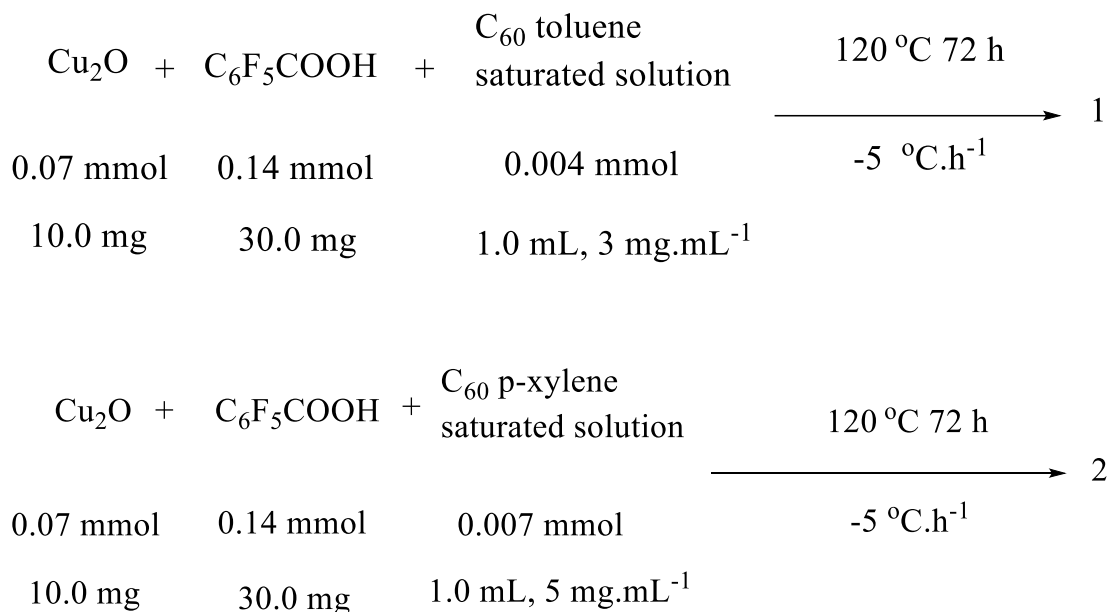

**Scheme S1** Schematic illustration of preparing the two 2D polymers.

**Table S1** Comparison of the selected bond lengths (Å) in the complexes **1** and **2**.

| bond lengths (Å) |          |          |          |
|------------------|----------|----------|----------|
| <b>1</b>         |          | <b>2</b> |          |
| Cu-Cu            |          |          |          |
| Cu1-Cu2          | 3.052(1) | Cu1-Cu2  | 3.004(1) |
| Cu-O             |          |          |          |
| Cu1-O1           | 2.114(2) | Cu1-O1   | 2.076(3) |
| Cu1-O4           | 1.956(2) | Cu1-O4   | 2.034(3) |
| Cu2-O2           | 2.035(2) | Cu2-O2   | 1.952(3) |
| Cu2-O3           | 2.052(2) | Cu2-O3   | 2.047(2) |
| Cu1-O3#1         | 2.158(2) | Cu3-O3   | 2.148(2) |
| Cu2-O1#2         | 2.115(2) | Cu3-O5   | 1.964(3) |
|                  |          | Cu3-O8   | 1.936(3) |
|                  |          | Cu1-O1#1 | 2.147(2) |
|                  |          | Cu2-O6#2 | 2.206(2) |
|                  |          | Cu3-O6#2 | 2.022(2) |
|                  |          | Cu3-O7#2 | 1.942(3) |
| Cu-C             |          |          |          |
| Cu1-C1           | 2.039(2) | Cu1-C1   | 2.069(4) |
| Cu1-C2           | 2.028(2) | Cu1-C2   | 2.054(4) |

|                                             |          |                                     |          |
|---------------------------------------------|----------|-------------------------------------|----------|
| Cu2-C3                                      | 2.028(2) | Cu2-C3                              | 2.011(4) |
| Cu2-C4                                      | 2.077(2) | Cu2-C4                              | 2.038(4) |
| coordinated C=C                             |          |                                     |          |
| C1-C2                                       | 1.423(3) | C1-C2                               | 1.418(7) |
| C3-C4                                       | 1.420(4) | C3-C4                               | 1.419(6) |
| Symmetry codes                              |          |                                     |          |
| #1 +x, 3/2-y, -1/2+z<br>#2 +x, 3/2-y, 1/2+z |          | #1 1-x, 1-y, -z<br>#2 1-x, 1-y, 1-z |          |

**Table S2** Comparison of the selected bond angles (°) in the complexes **1** and **2**.

| <b>1</b>     |           | <b>2</b>       |           |
|--------------|-----------|----------------|-----------|
| O-Cu-Cu      |           |                |           |
| O1-Cu1-Cu2   | 79.79(4)  | O1#1-Cu1-Cu2   | 155.76(6) |
| O3#1-Cu1-Cu2 | 156.77(4) | O1-Cu1-Cu2     | 79.74(6)  |
| O4-Cu1-Cu2   | 76.47(5)  | O4-Cu1-Cu2     | 74.96(8)  |
| O1#2-Cu2-Cu1 | 158.79(5) | O2-Cu2-Cu1     | 77.83(8)  |
| O2-Cu2-Cu1   | 77.16(5)  | O3-Cu2-Cu1     | 82.89(6)  |
| O3-Cu2-Cu1   | 79.62(4)  | O6#2-Cu2-Cu1   | 159.72(7) |
|              |           | O3-Cu3-Cu3#2   | 164.95(7) |
|              |           | O5-Cu3-Cu3#2   | 84.87(7)  |
|              |           | O6#2-Cu3-Cu3#2 | 83.36(6)  |
|              |           | O7#2-Cu3-Cu3#2 | 83.97(8)  |
|              |           | O8-Cu3-Cu3#2   | 84.15(9)  |
| O-Cu-O       |           |                |           |
| O1-Cu1-O4    | 102.03(8) | O1-Cu1-O4      | 98.83(1)  |
| O2-Cu2-O3    | 106.68(8) | O2-Cu2-O3      | 105.49(2) |
| O4-Cu1-O3#1  | 98.94(7)  | O1-Cu1-O1#1    | 79.43(2)  |
| O2-Cu2-O1#2  | 99.59(7)  | O4-Cu1-O1#1    | 96.19(1)  |
| O3-Cu2-O1#2  | 81.35(6)  | O5-Cu3-O3      | 110.18(1) |
| O1-Cu1-O3#1  | 78.97(6)  | O8-Cu3-O3      | 95.79(1)  |
|              |           | O8-Cu3-O5      | 90.20(3)  |
|              |           | O2-Cu2-O6#2    | 96.96(1)  |
|              |           | O3-Cu2-O6#2    | 79.64(9)  |
|              |           | O5-Cu3-O6#2    | 168.22(9) |

|                     |           |                  |           |
|---------------------|-----------|------------------|-----------|
|                     |           | O6#2-Cu3-O3      | 81.59(9)  |
|                     |           | O7#2-Cu3-O3      | 95.03(1)  |
|                     |           | O7#2-Cu3-O5      | 91.24(3)  |
|                     |           | O7#2-Cu3-O6#2    | 87.90(1)  |
|                     |           | O8-Cu3-O6#2      | 88.24(2)  |
|                     |           | O8-Cu3-O7#2      | 167.86(2) |
| O-Cu-C              |           |                  |           |
| O4-Cu1-C1           | 148.32(9) | O3-Cu1-C1        | 108.02(2) |
| O4-Cu1-C2           | 107.40(9) | O4-Cu1-C2        | 129.41(1) |
| O2-Cu2-C4           | 99.12(10) | O2-Cu2-C3        | 103.60(2) |
| O3-Cu2-C4           | 147.14(9) | O2-Cu2-C4        | 144.38(2) |
| C-Cu-Cu             |           |                  |           |
| C1-Cu1-Cu2          | 88.05(7)  | C1-Cu1-Cu2       | 87.38(1)  |
| C2-Cu1-Cu2          | 67.30(7)  | C2-Cu1-Cu2       | 67.40(2)  |
| C3-Cu2-Cu1          | 67.56(7)  | C3-Cu2-Cu1       | 69.10(1)  |
| C4-Cu2-Cu1          | 86.82(7)  | C4-Cu2-Cu1       | 88.98(2)  |
| C-Cu-O              |           |                  |           |
| C1-Cu1-O1           | 102.16(9) | C1-Cu1-O1        | 146.01(2) |
| C1-Cu1-O3#1         | 105.52(8) | C2-Cu1-O1        | 106.12(2) |
| C2-Cu1-O1           | 128.17(9) | C3-Cu2-O3        | 133.77(2) |
| C2-Cu1-O3#1         | 134.67(8) | C4-Cu2-O3        | 105.47(2) |
| C3-Cu2-O1#2         | 127.68(8) |                  |           |
| C3-Cu2-O2           | 124.91(9) |                  |           |
| C3-Cu2-O3           | 106.85(9) |                  |           |
| C4-Cu2-O1#2         | 114.35(8) |                  |           |
| C-Cu-C              |           |                  |           |
| C2-Cu1-C1           | 40.95(10) | C2-Cu1-C1        | 40.22(2)  |
| C3-Cu2-C4           | 40.44(10) | C3-Cu2-C4        | 41.05(2)  |
| Symmetry codes      |           |                  |           |
| #1+x, 3/2-y, -1/2+z |           | #1 1-x, 1-y, -z  |           |
| #2+x, 3/2-y, 1/2+z  |           | #2 1-x, 1-y, 1-z |           |

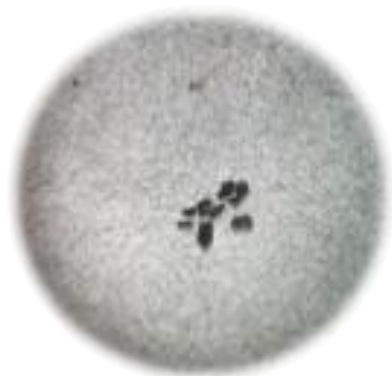

(a) complex 1

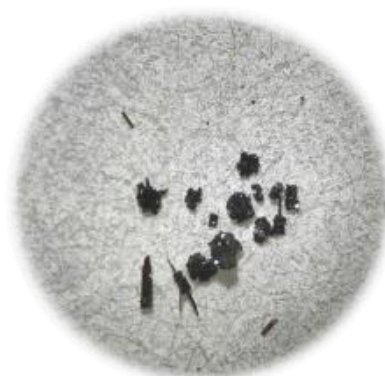

(b) complex 2

**Fig. S1** Crystal images of these cuprofullerene complexes amplified 40 times under a microscope.

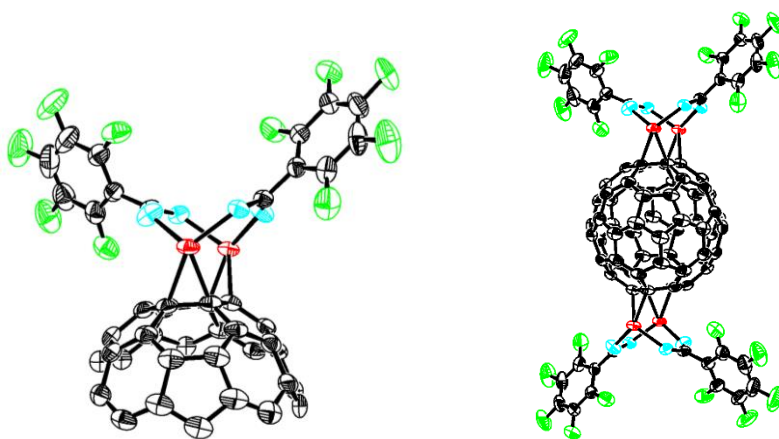

(a) complex 1

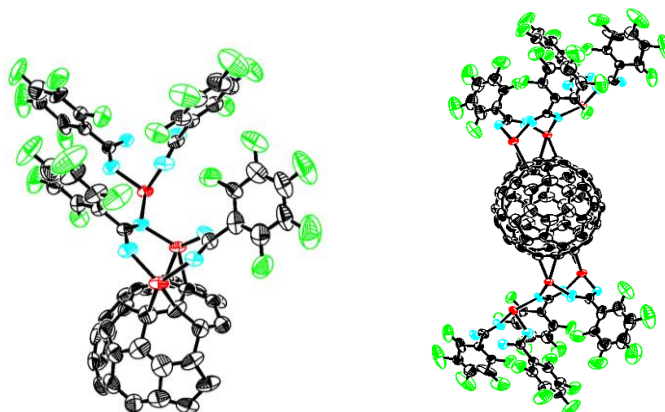

(b) complex 2

**Fig. S2** Asymmetric units (left) and molecular structures (right) of the complexes **1** (a) and **2** (b) with 50% thermal ellipsoid. (Color codes: red, Cu; cyan, O; green, F; black, C.)

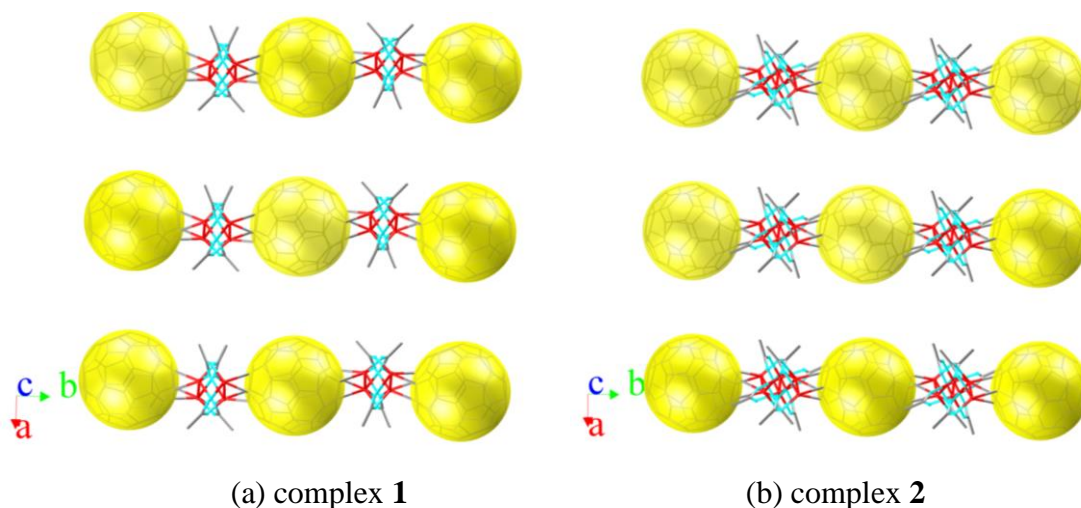

**Fig. S3** Packing structures of complexes **1** (a) and **2** (b). (-C<sub>5</sub>F<sub>5</sub> were omitted for clarity; Color codes: red, Cu; cyan, O; grey, C.).

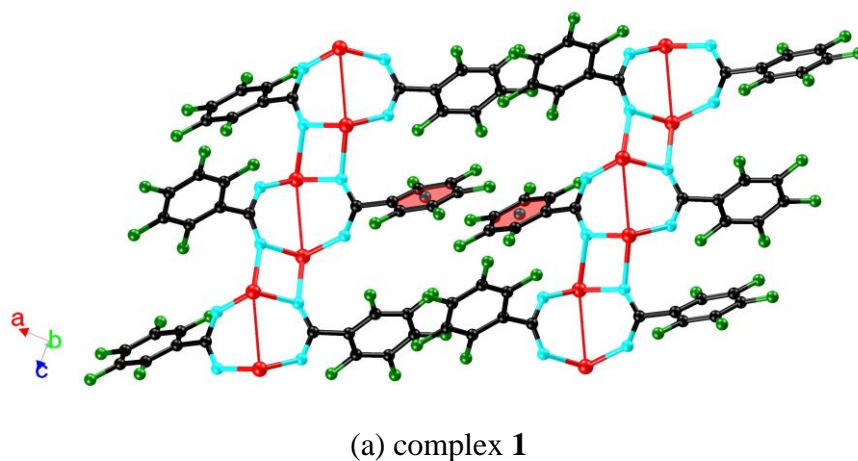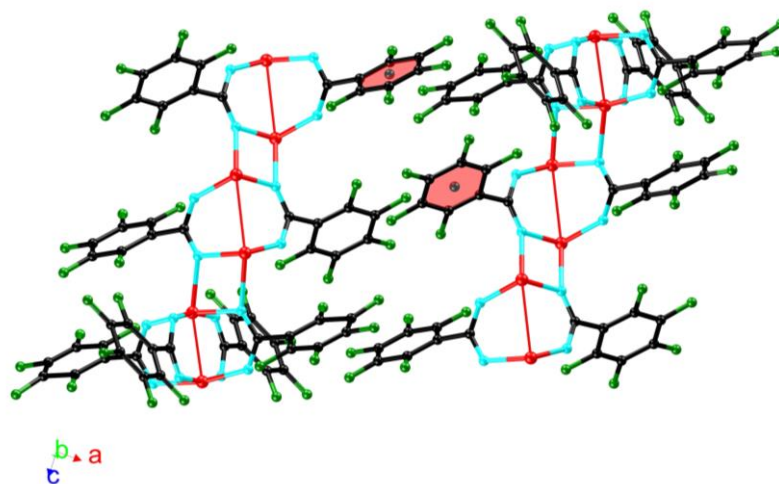

**Fig. S4** Weak interactions between these copper pentafluorobenzoate chains in complexes **1** (a) and **2** (b) to illustrate the interactions between the adjacent polymeric sheets. The shortest distances between the pentafluorophenyl centers are 5.561(7) Å in **1** and 5.029(1) Å in **2**. (Color codes: red, Cu; cyan, O; green, F; black, C.).

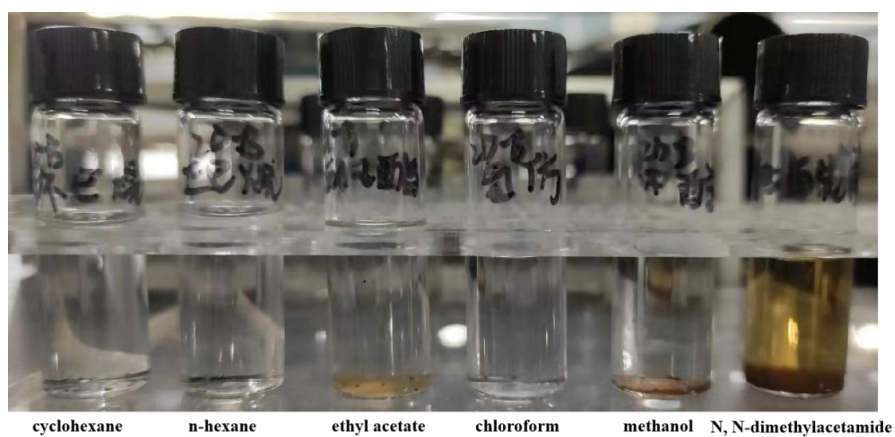

(a) complex 1

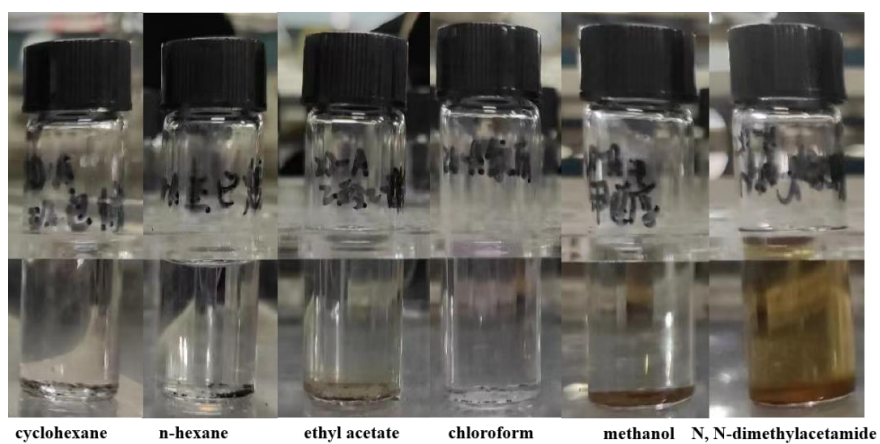

(b) complex 2

**Fig. S5** Crystal samples of complexes **1** (a) and **2** (b) soaked in common solvents (cyclohexane, *n*-hexane, ethyl acetate, chloroform, methanol, N, N-dimethylacetamide).

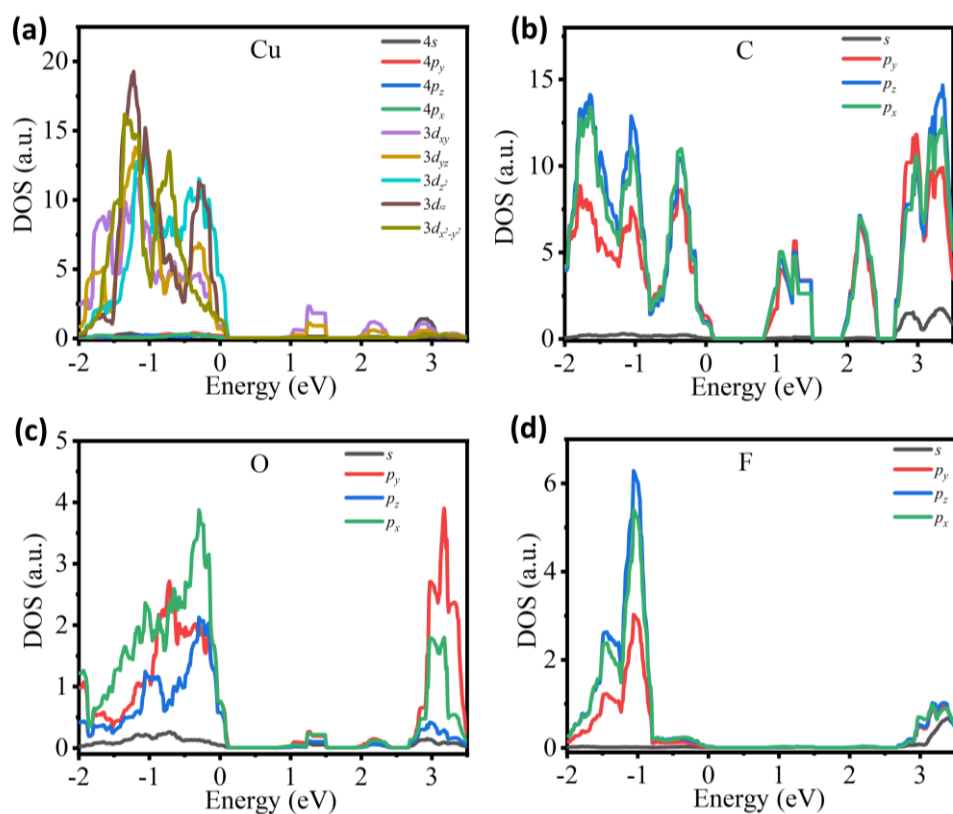

**Fig. S6** Density of states of the complex **1** for Cu, C, O and F.

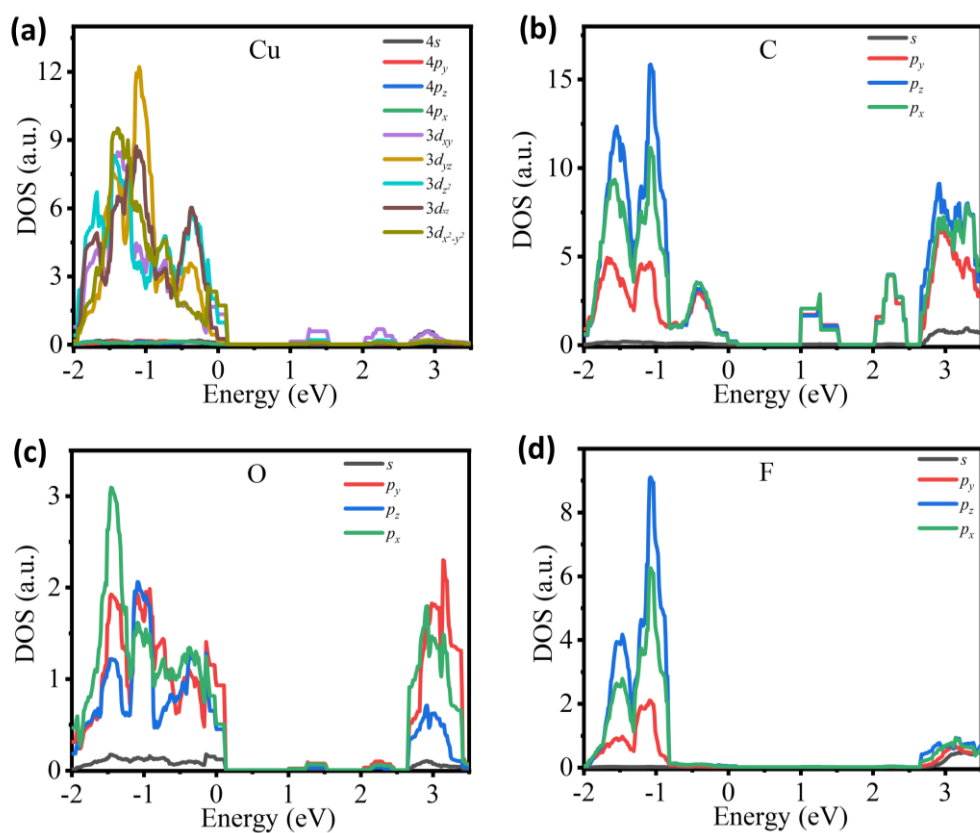

**Fig. S7** Density of states of the complex **2** for Cu, C, O and F.



**Table S3** The Hirshfeld compositions (%) of selected MOs in the ground state at the PBE0 level of theory for the tetranuclear cuprofullerene model.

| NO.       | Atom contributions |       |                 |
|-----------|--------------------|-------|-----------------|
|           | Cu                 | O     | C <sub>60</sub> |
| 435 (H-9) | 2.93               | 2.06  | 1.13            |
| 436 (H-8) | 1.22               | 1.12  | 0.60            |
| 437 (H-7) | 1.27               | 0.97  | 0.55            |
| 438 (H-6) | 33.91              | 25.02 | 16.30           |
| 439 (H-5) | 36.83              | 21.24 | 31.02           |
| 440 (H-4) | 17.21              | 7.76  | 71.79           |
| 441 (H-3) | 11.12              | 4.26  | 79.60           |
| 442 (H-2) | 0.14               | 0.08  | 99.60           |
| 443 (H-1) | 12.12              | 3.74  | 82.02           |
| 444 (H)   | 12.34              | 5.25  | 78.84           |
| 445 (L)   | 0.74               | 0.25  | 94.79           |
| 446 (L+1) | 8.43               | 1.75  | 88.70           |
| 447 (L+2) | 8.71               | 1.79  | 88.39           |
| 448 (L+3) | 9.24               | 1.86  | 85.28           |
| 449 (L+4) | 5.11               | 0.85  | 92.64           |
| 450 (L+5) | 1.78               | 0.44  | 97.28           |
| 451 (L+6) | 7.76               | 1.26  | 89.24           |
| 452 (L+7) | 6.29               | 1.11  | 90.28           |
| 453 (L+8) | 6.33               | 1.38  | 88.66           |
| 454 (L+9) | 7.03               | 1.61  | 86.96           |

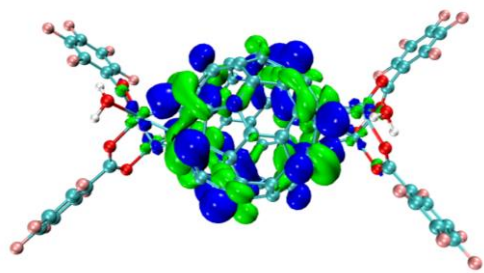

LUMO+9

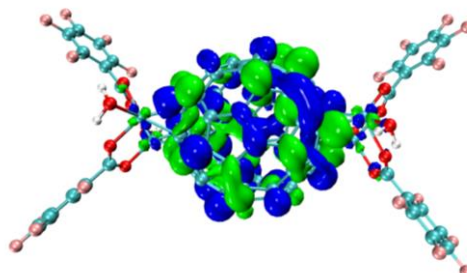

LUMO+8

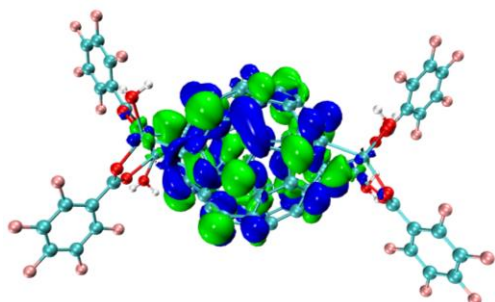

LUMO+7

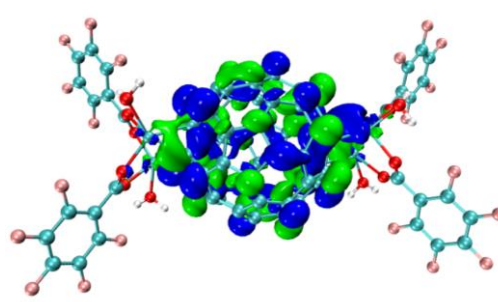

LUMO+6

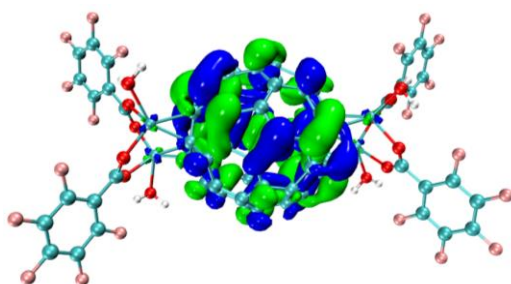

LUMO+5

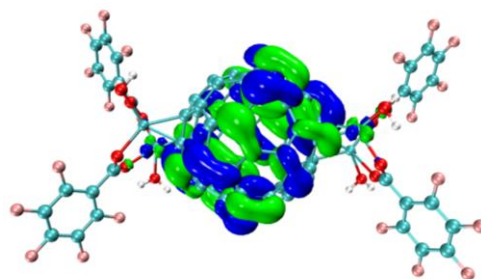

LUMO+4

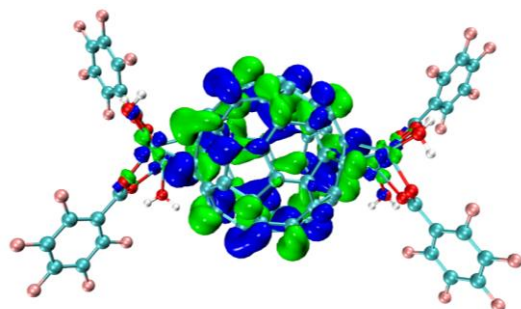

LUMO+3

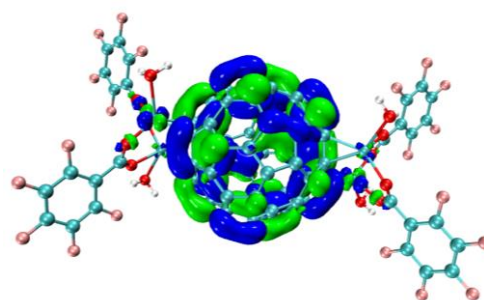

LUMO+2

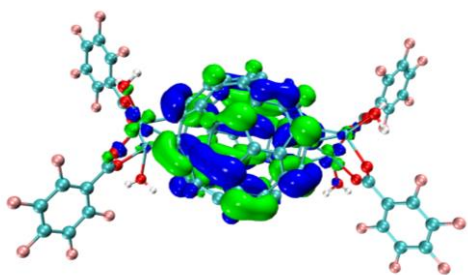

LUMO+1

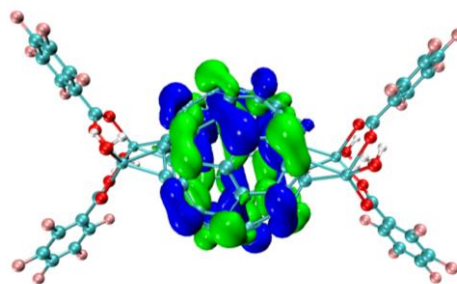

LUMO

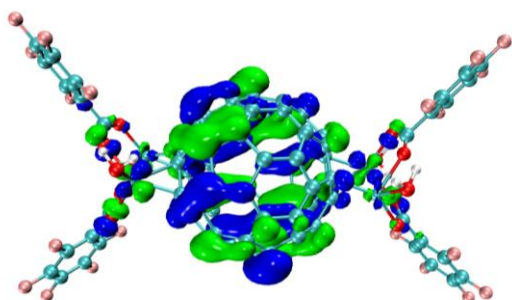

HOMO

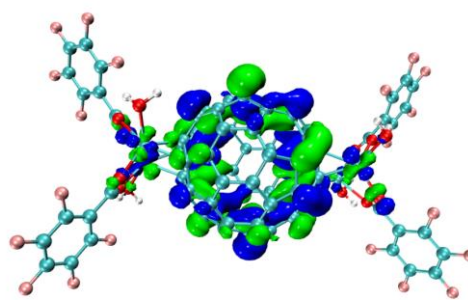

HOMO-1

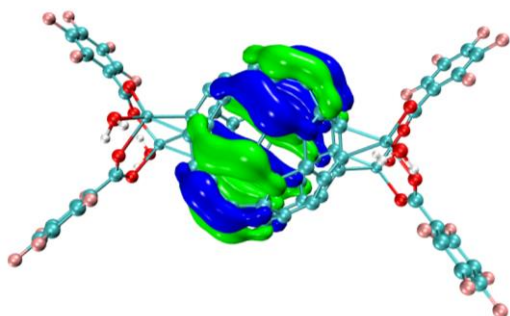

HOMO-2

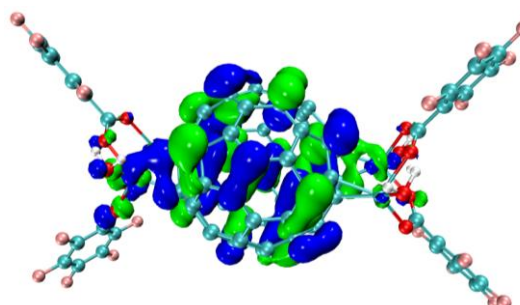

HOMO-3

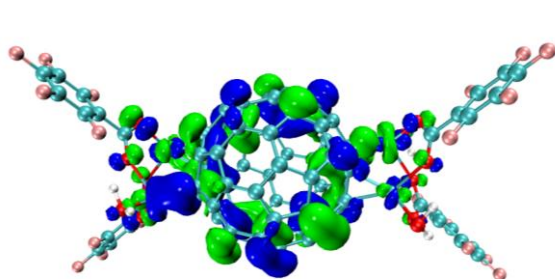

HOMO-4

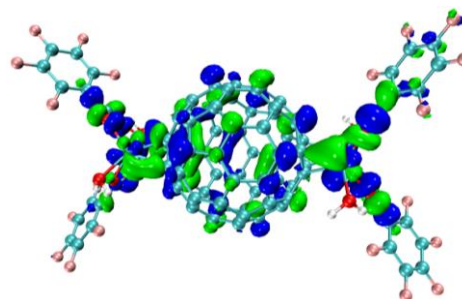

HOMO-5

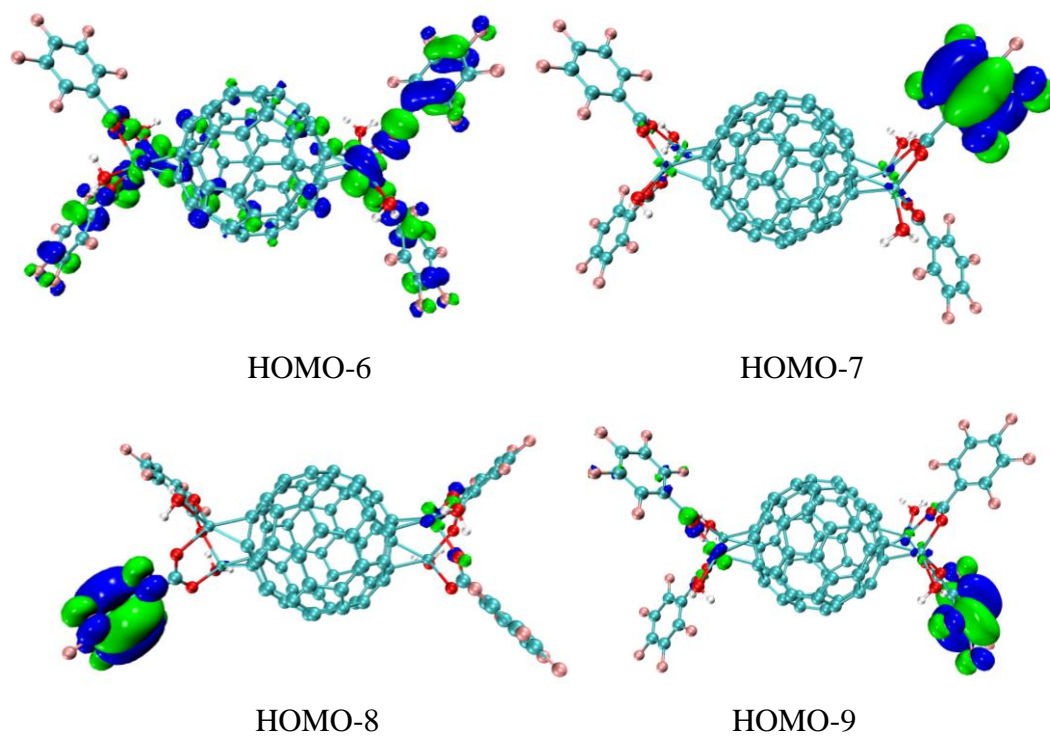

**Fig. S8** The contour of frontier molecular orbitals from HOMO-9 to LUMO+9 at the PBE0 level of theory for the tetranuclear cuprofullerene model (isovalue = 0.02).
